# Supplementary material for: Bunyaviruses Affect Growth, Sporulation, and Elicitin Production in Phytophthora cactorum
Source: MDPI journal article supplement (doi:10.3390/v14122596), 2022-11-22
Supplement: s1 [file s1]

|               |                                              |        | Read counts<br>PhF66- (no viruses) |       |       |       |      | PhF66 (PcBV1&PcBV2) |       |        |        |        |                 |          |            |
|---------------|----------------------------------------------|--------|------------------------------------|-------|-------|-------|------|---------------------|-------|--------|--------|--------|-----------------|----------|------------|
| Accession     | Description                                  | length | R1                                 | R2    | R3    | R7    | R8   | R4                  | R5    | R6     | R9     | R10    | log2Fold Change | FDR      | Padj       |
| KAF1787014.1  | hypothetical protein GQ600_18332             | 581    | 0                                  | 0     | 0     | 0     | 0    | 12,91               | 17,78 | 21,27  | 21,19  | 15,59  | 6,56            | 0,000002 | 3.512e-117 |
| KAF1778147.1  | Riboflavin synthase-like beta-barrel         | 1444   | 1,5                                | 0,92  | 1,54  | 4,68  | 1,66 | 22,08               | 54,9  | 8,28   | 8,28   | 10,26  | 2,70            | 0,000053 | 2.961e-25  |
| KAF1774323.1  | Elicitin                                     | 534    | 52,63                              | 47,31 | 47,61 | 7,9   | 8,57 | 45,43               | 77,86 | 283,71 | 293,98 | 292,02 | 2,68            | 0        | 1.512e-135 |
| KAF1774322.1  | Elicitin                                     | 516    | 0,11                               | 0,16  | 0     | 0,08  | 0    | 0,07                | 0,25  | 2,92   | 2,77   | 2,32   | 2,49            | 0,000513 | 1.226e-11  |
| KAF1789104.1  | hypothetical protein GQ600_9925              | 270    | 0,75                               | 0,84  | 0,35  | 0,45  | 0,58 | 4,82                | 5,01  | 4,02   | 2,77   | 3,87   | 2,43            | 0,00005  | 4.134e-21  |
| KAF1774139.1  | hypothetical protein GQ600_10043             | 470    | 0,15                               | 0,08  | 0,04  | 0,12  | 0,12 | 0,91                | 2,96  | 0,69   | 1,26   | 1,22   | 2,39            | 0,000147 | 2.717e-11  |
| KAF1781019.1* | Elicitin                                     | 357    | 1,94                               | 0,72  | 1,41  | 0,04  | 0    | 0,98                | 1,34  | 6,99   | 28,63  | 13,27  | 2,35            | 0,000294 | 2.485e-10  |
| KAF1780261.1  | SMP-30/Gluconolactonase/LRE-like region      | 1114   | 2,13                               | 2,32  | 1,19  | 2,65  | 1,12 | 15,59               | 14,53 | 8,43   | 7,82   | 7,16   | 2,19            | 0,000161 | 1.754e-18  |
| KAF1780813.1  | hypothetical protein GQ600_560               | 264    | 1,31                               | 1,64  | 0,84  | 0,9   | 0,42 | 7,4                 | 2,34  | 7,39   | 5,93   | 6,8    | 2,14            | 0,000655 | 3.324e-12  |
| KAF1785474.1  | Nucleotide-diphospho-sugar transferase       | 879    | 0,82                               | 0,32  | 0,66  | 2,28  | 0,87 | 6,96                | 19,45 | 2,43   | 2,52   | 2,77   | 2,07            | 0,000655 | 4.261e-12  |
| KAF1791367.1  | hypothetical protein GQ600_10067             | 351    | 0,37                               | 1,04  | 0,71  | 1,63  | 0,46 | 6,67                | 4,22  | 3,07   | 3,91   | 3,58   | 1,95            | 0,000966 | 1.971e-10  |
| KAF1780813.1  | hypothetical protein GQ600_560               | 587    | 1,38                               | 0,68  | 0,88  | 0,41  | 1,04 | 4,68                | 5,22  | 3,32   | 2,9    | 2,77   | 1,79            | 0,000779 | 2.73e-10   |
| KAF1789026.1  | hypothetical protein GQ600_10132             | 702    | 0,71                               | 0,56  | 1,85  | 3,58  | 1,04 | 10,59               | 16,11 | 4,41   | 3,7    | 3,42   | 1,79            | 0,002086 | 5.979e-09  |
| KAF1779177.1  | hypothetical protein GQ600_27577             | 542    | 0,04                               | 0,08  | 0,09  | 0,04  | 0    | 0,94                | 1,34  | 0,5    | 0,55   | 0,16   | 1,79            | 0,004299 | 6.682e-06  |
| KAF1788372.1  | Major facilitator superfamily domain         | 1378   | 2,24                               | 3,44  | 2,47  | 1,1   | 0,25 | 2,32                | 6,35  | 7,83   | 10,22  | 9,08   | 1,76            | 0,001655 | 7.031e-10  |
| KAF1788051.1  | hypothetical protein GQ600_26909             | 495    | 0,26                               | 0,24  | 0,35  | 12,62 | 2,08 | 30,75               | 66,33 | 1,74   | 1,22   | 1,87   | 1,74            | 0,002062 | 3.684e-06  |
| KAF1782571.1  | hypothetical protein GQ600_10993             | 346    | 1,57                               | 1,24  | 1,24  | 3,22  | 2,2  | 12,98               | 16,07 | 3,47   | 2,99   | 4,03   | 1,72            | 0,000287 | 4.189e-14  |
| KAF1776425.1  | hypothetical protein GQ600_14855             | 296    | 1,87                               | 2,12  | 2,47  | 0,04  | 0,29 | 2,43                | 0,88  | 7,24   | 6,39   | 7,33   | 1,71            | 0,003595 | 1.583e-07  |
| KAF1787242.1  | hypothetical protein GQ600_9309              | 393    | 0,07                               | 0     | 0,04  | 0,49  | 0,67 | 1,63                | 1,88  | 0,64   | 0,92   | 0,57   | 1,70            | 0,003778 | 4.735e-06  |
| KAF1781184.1  | CAP domain                                   | 4548   | 3,25                               | 4,12  | 4,9   | 3,3   | 3,24 | 18,64               | 18,03 | 9,27   | 9,5    | 11,85  | 1,69            | 0,000273 | 2.952e-14  |
| KAF1789435.1  | Multicopper oxidase, type 3                  | 2747   | 1,83                               | 3,76  | 3,31  | 0     | 0    | 0                   | 0,33  | 11,75  | 9,33   | 12,17  | 1,67            | 0,006262 | 2.229e-08  |
| KAF1788424.1  | hypothetical protein GQ600_6414              | 3948   | 0,52                               | 0,36  | 0,26  | 0,12  | 0    | 0,87                | 0,63  | 1,54   | 1,14   | 1,55   | 1,65            | 0,003913 | 5.982e-06  |
| KAF1783256.1  | EGF-like domain                              | 4737   | 0,67                               | 1,12  | 0,93  | 0,29  | 0    | 1,34                | 1     | 3,12   | 4,29   | 1,99   | 1,65            | 0,00493  | 1.281e-06  |
| KAF1785530.1  | hypothetical protein GQ600_22799             | 454    | 0,15                               | 0,04  | 0,26  | 0     | 0    | 0,15                | 0,33  | 1,54   | 0,84   | 0,69   | 1,64            | 0,006025 | 4.821e-05  |
| KAF1780101.1  | Amino acid transporter, transmembrane domain | 6135   | 0,71                               | 1,2   | 0,44  | 0,29  | 0,04 | 0,76                | 3,13  | 2,63   | 2,1    | 2,85   | 1,59            | 0,006382 | 1.514e-05  |
| KAF1774329.1  | Necrosis inducing protein                    | 696    | 4,75                               | 4,44  | 6,18  | 0,37  | 0,17 | 1,52                | 4,47  | 11,55  | 12,24  | 13,88  | 1,57            | 0,00385  | 3.247e-07  |
| KAF1789629.1  | Zinc finger, C2H2-like                       | 6766   | 0,11                               | 0,16  | 0,09  | 0     | 0    | 0,69                | 2,13  | 0,89   | 0,5    | 0,33   | 1,57            | 0,008492 | 0.0001281  |
| KAF1774124.1  | hypothetical protein GQ600_1308              | 1475   | 0,37                               | 0,4   | 0,79  | 0,08  | 0,17 | 1,74                | 0,79  | 1,78   | 1,64   | 1,3    | 1,55            | 0,004658 | 2.249e-05  |
| KAF1780238.1  | Lipoxygenase, C-terminal                     | 1701   | 12,45                              | 11,56 | 11,03 | 5,66  | 5,66 | 9,97                | 18,7  | 35,94  | 37,97  | 36,02  | 1,54            | 0,000009 | 2.814e-29  |
| KAF1795599.1  | Hypoxia induced protein, domain              | 603    | 5,05                               | 4,6   | 4,37  | 0,12  | 0,29 | 0,44                | 0,42  | 14,33  | 17,24  | 13,15  | 1,54            | 0,000287 | 8.566e-14  |
| KAF1775647.1  | hypothetical protein GQ600_1350              | 416    | 0,04                               | 0     | 0     | 0     | 0    | 0,04                | 0     | 0,64   | 0,71   | 0,65   | 1,54            | 0,004829 | 0.0001323  |
| KAF1779203.1  | hypothetical protein GQ600_5881              | 320    | 0,07                               | 0,04  | 0,04  | 4,4   | 0,42 | 12,44               | 16,53 | 0,55   | 0,76   | 0,65   | 1,53            | 0,004672 | 0.0001748  |
| KAF1787920.1  | hypothetical protein GQ600_27546             | 909    | 1,05                               | 2     | 1,28  | 0,65  | 0,21 | 2,39                | 4,93  | 2,97   | 3,83   | 3,62   | 1,53            | 0,004782 | 2.299e-06  |
| KAF1780226.1  | hypothetical protein GQ600_22014             | 557    | 9,05                               | 7,88  | 9,49  | 0,57  | 0,21 | 1,23                | 0,75  | 26,37  | 26,78  | 25,07  | 1,52            | 0,000287 | 3.676e-18  |

|                |                                                     |       |       |       |       |            |            |            |            |       |       |       |       |             |           |
|----------------|-----------------------------------------------------|-------|-------|-------|-------|------------|------------|------------|------------|-------|-------|-------|-------|-------------|-----------|
| KAF1775607.1*  | DNA polymerase family X lyase domain                | 3771  | 5,16  | 5,6   | 4,77  | 141,9<br>3 | 116,3<br>5 | 218,7<br>4 | 287,2<br>6 | 20,23 | 23,5  | 18,36 | 1,51  | 0,000175    | 3.043e-15 |
| KAF1774080.1   | Ankyrin repeat-containing domain                    | 8756  | 0,9   | 0,4   | 1,19  | 5,17       | 1,29       | 10,01      | 16,91      | 2,38  | 2,56  | 2,69  | 1,51  | 0,00502     | 1.378e-06 |
| KAF1789581.1   | Metallopeptidase, catalytic domain                  | 1235  | 1,08  | 0,96  | 0,75  | 0,04       | 0,21       | 1,23       | 2,46       | 1,74  | 2,61  | 2,28  | 1,50  | 0,007432    | 2.231e-05 |
| KAF1788825.1   | Ankyrin repeat-containing domain                    | 1174  | 34,09 | 38,83 | 36,01 | 33,31      | 39,71      | 0          | 0          | 0,25  | 0,29  | 0,24  | -3,70 | 0           | 3.381e-24 |
| KAF1791464.1   | WD40/YVTN repeat-like-containing domain             | 5799  | 5,27  | 4,96  | 5,47  | 4,56       | 5,41       | 0,36       | 0,04       | 0,3   | 0,5   | 0,45  | -3,24 | 0,000041    | 7.109e-35 |
| KAF1788826.1   | hypothetical protein GQ600_3050                     | 762   | 2,73  | 1,96  | 1,94  | 0,49       | 1,7        | 0          | 0          | 0     | 0     | 0     | -3,21 | 0,000421    | 1.598e-18 |
| KAF1775491.1   | WD40-repeat-containing domain                       | 6238  | 2,77  | 2,2   | 2,6   | 2,52       | 1,58       | 0,11       | 0,38       | 0,1   | 0,04  | 0,08  | -2,72 | 0,000065    | 1.234e-15 |
| KAF1791150.1   | hypothetical protein GQ600_24668                    | 3162  | 9,79  | 11,8  | 12,58 | 13,97      | 13,02      | 3,08       | 1,54       | 0,69  | 0,76  | 0,85  | -2,69 | 0,000062    | 5.411e-25 |
| KAF1789612.1   | putative domain, di-copper centre                   | 1712  | 15,59 | 12,76 | 13,94 | 5,33       | 4,95       | 0,98       | 0,38       | 2,28  | 1,89  | 1,83  | -2,54 | 0,000029    | 1.779e-39 |
| KAF1790519.1   | putative domain, di-copper centre                   | 444   | 2,8   | 2,64  | 3,35  | 1,18       | 0,75       | 0,22       | 0          | 0,3   | 0,13  | 0,28  | -2,45 | 0,000347    | 8.409e-14 |
| KAF1789787.1   | hypothetical protein GQ600_24324                    | 311   | 4,45  | 3,72  | 3,79  | 2          | 1,04       | 0,25       | 0,21       | 0,5   | 0,63  | 0,16  | -2,34 | 0,000161    | 1.435e-14 |
| KAF1792605.1   | hypothetical protein GQ600_23700                    | 6403  | 11,51 | 13,08 | 11,21 | 29,07      | 23,2       | 4,5        | 3,42       | 2,33  | 2,4   | 1,91  | -2,32 | 0,000008    | 5.930e-41 |
| KAF1795150.1   | Tetratricopeptide repeat                            | 7222  | 16,15 | 15,16 | 16,02 | 30,86      | 24,7       | 4,68       | 4,97       | 3,57  | 2,48  | 2,61  | -2,31 | 0,000001    | 1.990e-58 |
| KAF1782989.1   | WD repeat-containing protein 90                     | 7515  | 5,05  | 4,92  | 5,47  | 5,13       | 4,32       | 1,2        | 1,13       | 0,45  | 0,67  | 0,28  | -2,29 | 0,000164    | 1.408e-17 |
| KAF1782797.1** | Thrombospondin type-1 (TSP1) repeat                 | 7184  | 67,62 | 56,07 | 58,42 | 14,66      | 11,35      | 1,99       | 2,46       | 12,74 | 11,94 | 9,53  | -2,29 | 0,000001    | 1.798e-62 |
| KAF1783174.1   | hypothetical protein GQ600_25520                    | 558   | 0,78  | 0,84  | 0,88  | 0,41       | 0,71       | 0          | 0          | 0     | 0,04  | 0,04  | -2,28 | 0,000328    | 2.793e-09 |
| KAF1775375.1** | Carbonic anhydrase, alpha-class, conserved site     | 661   | 24,45 | 20,76 | 23,17 | 1,55       | 1,75       | 0,51       | 0,75       | 1,74  | 2,77  | 1,83  | -2,24 | 0,000232    | 1.057e-15 |
| KAF1793614.1   | hypothetical protein GQ600_19168                    | 3971  | 9,38  | 9,6   | 9,58  | 10,42      | 13,06      | 1,81       | 1,34       | 2,58  | 1,85  | 1,55  | -2,23 | 0,00003     | 3.717e-29 |
| KAF1783504.1   | WD40-repeat-containing domain                       | 3039  | 1,16  | 2,12  | 1,72  | 1,59       | 2,49       | 0,33       | 0,38       | 0,2   | 0,13  | 0     | -2,21 | 0,000635    | 1.459e-10 |
| KAF1783853.1   | Katanin p60 subunit A1                              | 2091  | 11,85 | 15,64 | 14,21 | 12,54      | 14,97      | 3,44       | 3,42       | 1,98  | 1,64  | 2,48  | -2,19 | 0,000019    | 3.637e-31 |
| KAF1793060.1   | EF-Hand 1, calcium-binding site                     | 804   | 1,46  | 1,92  | 1,85  | 1,26       | 0,62       | 0,04       | 0,13       | 0,1   | 0,17  | 0,33  | -2,18 | 0,000247    | 3.848e-10 |
| KAF1772692.1   | EF-hand domain pair                                 | 2739  | 1,31  | 1,2   | 1,94  | 1,34       | 0,83       | 0,15       | 0,13       | 0     | 0     | 0     | -2,12 | 0,000757    | 5.660e-08 |
| KAF1789078.1   | WD40-repeat-containing domain                       | 2961  | 2,8   | 3,76  | 3,22  | 3,91       | 4,12       | 0,8        | 1,04       | 0,25  | 0,38  | 0,69  | -2,12 | 0,000098    | 7.697e-17 |
| KAF1794169.1   | Organic solute carrier protein 1                    | 5303  | 5,53  | 6,96  | 6,35  | 11,81      | 10,35      | 3,37       | 3,46       | 0,79  | 0,42  | 0,28  | -2,11 | 0,000655    | 1.168e-12 |
| KAF1782147.1   | P-loop containing nucleoside triphosphate hydrolase | 13632 | 6,65  | 5,24  | 4,85  | 7,94       | 8,48       | 1,34       | 2          | 1,69  | 0,63  | 0,69  | -2,10 | 0,000126    | 8.209e-21 |
| KAF1788166.1   | hypothetical protein GQ600_1662                     | 1674  | 0,52  | 0,6   | 0,26  | 0,9        | 0,5        | 0          | 0          | 0     | 0     | 0     | -2,04 | 0,002536    | 2.247e-07 |
| KAF1790794.1   | Ricin B, lectin domain                              | 2773  | 1,91  | 1,76  | 1,72  | 2,65       | 2,16       | 0,44       | 0,46       | 0,15  | 0,38  | 0,37  | -1,99 | 0.206461    | 2.539e-12 |
| KAF1791412.1   | hypothetical protein GQ600_969                      | 321   | 3,4   | 2,52  | 3,13  | 7          | 6,4        | 2,36       | 1,34       | 0,35  | 0,25  | 0,24  | -1,99 | 0.00068388  | 6.132e-11 |
| KAF1775053.1   | Ricin B, lectin domain                              | 5530  | 35,29 | 30,11 | 28,2  | 6,56       | 7,48       | 2,47       | 1,92       | 5,3   | 6,22  | 4,4   | -1,98 | 2.95208e-05 | 5.305e-24 |
| KAF1787863.1   | Major facilitator superfamily domain                | 2128  | 1,68  | 1,28  | 0,97  | 0,29       | 0,91       | 0,07       | 0,08       | 0,1   | 0,13  | 0,12  | -1,97 | 0.135942    | 1.431e-07 |
| KAF1783713.1   | WD40 repeat, conserved site                         | 1028  | 1,72  | 1,12  | 1,68  | 3,58       | 2,29       | 0,29       | 0,38       | 0,45  | 0,17  | 0,37  | -1,97 | 0.0804786   | 6.110e-10 |
| KAF1794153.1   | Enolase C-terminal domain-like                      | 1725  | 2,69  | 2,84  | 2,6   | 8,71       | 12,23      | 1,67       | 1,46       | 0,55  | 0,59  | 1,02  | -1,95 | 0.000144403 | 1.853e-15 |
| KAF1784586.1   | Immunoglobulin-like fold                            | 1788  | 10,95 | 10,96 | 10,41 | 22,23      | 17,76      | 6,64       | 5,05       | 1,69  | 1,51  | 2,24  | -1,94 | 0.000193322 | 5.483e-21 |
| KAF1789763.1   | YHYH domain                                         | 15168 | 9,72  | 8,64  | 8,78  | 34,45      | 32,48      | 7,76       | 5,51       | 2,68  | 1,85  | 2,36  | -1,92 | 2.76201e-06 | 1.269e-26 |
| KAF1793045.1   | Cadherin-like                                       | 27642 | 25,19 | 23,71 | 24,93 | 66,94      | 58,17      | 6,6        | 2,88       | 7,09  | 6,73  | 3,58  | -1,91 | 0.0907047   | 2.120e-08 |
| KAF1793065.1   | Tetraspanin/Peripherin                              | 1068  | 0,78  | 0,44  | 0,4   | 1,18       | 1,08       | 0,07       | 0          | 0,1   | 0,08  | 0,04  | -1,90 | 0.385762    | 1.034e-06 |
| KAF1789775.1   | Leucine-rich repeat domain, L domain-like           | 3068  | 23,7  | 24,51 | 24,58 | 34,57      | 34,31      | 10,77      | 9,14       | 5,16  | 4,92  | 4,97  | -1,90 | 0.000284202 | 2.895e-38 |
| KAF1775645.1   | MORN motif                                          | 786   | 0,75  | 1,64  | 0,53  | 1,38       | 0,54       | 0,07       | 0,21       | 0     | 0,04  | 0,08  | -1,88 | 0.589454    | 1.657e-06 |
| KAF1794577.1   | EGF-like domain, extracellular                      | 1743  | 5,08  | 4,6   | 5,25  | 2,97       | 2,29       | 0,76       | 0,83       | 0,89  | 0,8   | 0,98  | -1,88 | 0.154222    | 5.930e-16 |
| KAF1795122.1   | hypothetical protein GQ600_5281                     | 2214  | 2,8   | 1,6   | 1,9   | 7,45       | 2,62       | 0,69       | 0,71       | 0,64  | 0,38  | 0,45  | -1,84 | 0.0261709   | 7.621e-09 |

|              |                                                     |       |        |        |        |        |        |       |       |       |       |       |       |             |           |
|--------------|-----------------------------------------------------|-------|--------|--------|--------|--------|--------|-------|-------|-------|-------|-------|-------|-------------|-----------|
| KAF1778784.1 | Acyltransferase ChoActase/COT/CPT                   | 2080  | 177,15 | 154,97 | 166,53 | 139,04 | 39,38  | 15,59 | 28,97 | 35,2  | 39,73 | 36,92 | -1,81 | 0.036186    | 5.327e-14 |
| KAF1789236.1 | hypothetical protein GQ600_10648                    | 1418  | 7,21   | 5,64   | 5,21   | 0,77   | 0,96   | 0,36  | 0,04  | 1,44  | 0,8   | 1,42  | -1,81 | 0.000108385 | 7.288e-11 |
| KAF1775095.1 | Major facilitator superfamily domain                | 1774  | 17,01  | 16,6   | 17,03  | 5,33   | 5,9    | 0,47  | 0,42  | 6,64  | 5,21  | 5,37  | -1,78 | 0.000127684 | 1.099e-10 |
| KAF1787086.1 | Leucine-rich repeat domain, L domain-like           | 768   | 0,49   | 0,64   | 0,4    | 0,49   | 0,42   | 0     | 0,04  | 0,05  | 0     | 0,04  | -1,77 | 0.878756    | 9.478e-06 |
| KAF1774875.1 | hypothetical protein GQ600_17919                    | 705   | 2,84   | 2,48   | 2,56   | 2,28   | 1,91   | 0,29  | 0,13  | 0,74  | 0,71  | 0,9   | -1,75 | 0.0732103   | 4.381e-09 |
| KAF1780886.1 | Zinc finger, C2H2                                   | 3580  | 6,43   | 5,88   | 6,88   | 12,62  | 10,94  | 3,48  | 4,22  | 0,89  | 1,47  | 1,59  | -1,75 | 0.000260975 | 8.806e-20 |
| KAF1775423.1 | hypothetical protein GQ600_13315                    | 2556  | 0,93   | 1,56   | 0,66   | 1,59   | 2,45   | 0,51  | 0,13  | 0,2   | 0,21  | 0,08  | -1,73 | 0.0662661   | 2.327e-06 |
| KAF1785015.1 | hypothetical protein GQ600_26539                    | 2417  | 1,87   | 1,6    | 1,81   | 1,79   | 2,12   | 0,36  | 0,58  | 0,25  | 0,38  | 0,53  | -1,71 | 0.603209    | 2.301e-09 |
| KAF1784909.1 | Nephrocystin-4                                      | 912   | 4,07   | 3,64   | 3,71   | 1,87   | 2,49   | 0,65  | 1,17  | 0,84  | 0,38  | 0,41  | -1,70 | 0.818245    | 2.020e-08 |
| KAF1779294.1 | hypothetical protein GQ600_3066                     | 831   | 0,49   | 0,52   | 0,66   | 0,77   | 0,71   | 0     | 0     | 0     | 0     | 0,16  | -1,69 | 0.936428    | 2.652e-05 |
| KAF1784585.1 | Immunoglobulin-like fold                            | 9052  | 10,54  | 12,36  | 10,59  | 70,11  | 63,5   | 20,2  | 16,99 | 2,78  | 2,99  | 3,5   | -1,68 | 1.47137e-08 | 1.267e-29 |
| KAF1793541.1 | Intraflagellar transport protein 43                 | 934   | 1,35   | 1,2    | 1,63   | 0,98   | 0,62   | 0,25  | 0,08  | 0,3   | 0,25  | 0,16  | -1,68 | 0.264498    | 1.765e-06 |
| KAF1774902.1 | P-loop containing nucleoside triphosphate hydrolase | 5825  | 0,45   | 0,44   | 0,75   | 3,01   | 2,29   | 0,58  | 0,63  | 0,15  | 0,04  | 0     | -1,67 | 0.000148974 | 3.362e-06 |
| KAF1780466.1 | P-loop containing nucleoside triphosphate hydrolase | 950   | 2,95   | 3,48   | 2,16   | 2,12   | 1,25   | 0,29  | 0,29  | 0,5   | 0,8   | 0,98  | -1,66 | 0.0212304   | 2.174e-08 |
| KAF1773637.1 | Leucine-rich repeat domain, L domain-like           | 1404  | 10,47  | 9,84   | 9,4    | 9,41   | 15,3   | 3,37  | 3,8   | 2,08  | 2,73  | 3,13  | -1,66 | 0.14535     | 3.271e-21 |
| KAF1781432.1 | Tctex-1                                             | 544   | 8,37   | 8,68   | 8,96   | 5,82   | 7,24   | 1,85  | 3,55  | 1,83  | 1,64  | 1,79  | -1,66 | 0.790901    | 7.937e-15 |
| KAF1784110.1 | WD40-repeat-containing domain                       | 4389  | 8,71   | 7,4    | 8,16   | 10,99  | 8,32   | 2,97  | 2,88  | 2,18  | 2,48  | 1,75  | -1,65 | 0.202616    | 1.449e-20 |
| KAF1781812.1 | hypothetical protein GQ600_19402                    | 768   | 5,87   | 7,56   | 5,82   | 7,65   | 4,41   | 1,63  | 2,88  | 1,19  | 1,05  | 1,71  | -1,64 | 0.341503    | 2.206e-11 |
| KAF1795309.1 | Ciliary BBSome complex subunit 2, C-terminal domain | 2012  | 5,72   | 6,28   | 4,94   | 3,3    | 2,74   | 0,65  | 0,83  | 1,83  | 1,89  | 1,22  | -1,63 | 0.00655921  | 1.749e-14 |
| KAF1787171.1 | Acyl-CoA N-acyltransferase                          | 468   | 0,86   | 1,64   | 0,84   | 6,8    | 13,81  | 3,23  | 3,01  | 0,1   | 0,17  | 0,16  | -1,62 | 2.37511e-06 | 4.594e-07 |
| KAF1776868.1 | MORN motif                                          | 2485  | 0,19   | 0,32   | 0,62   | 0,73   | 0,25   | 0     | 0     | 0     | 0     | 0     | -1,62 | 0.762235    | 4.781e-05 |
| KAF1775975.1 | S-adenosyl-L-methionine-dependent methyltransferase | 808   | 5,91   | 7,2    | 5,34   | 4,19   | 2,87   | 1,23  | 1,84  | 0,89  | 1,14  | 1,42  | -1,61 | 0.631741    | 3.563e-10 |
| KAF1795857.1 | Zinc/iron permease                                  | 981   | 7,4    | 6,48   | 6,57   | 28,54  | 22,83  | 2,36  | 2,63  | 2,73  | 3,28  | 2,93  | -1,61 | 0.0296208   | 5.111e-08 |
| KAF1783359.1 | EGF-like domain, extracellular                      | 683   | 10,47  | 8,64   | 8,78   | 2,36   | 2,04   | 1,2   | 0,79  | 2,08  | 1,85  | 1,59  | -1,60 | 0.00126877  | 1.665e-10 |
| KAF1788186.1 | hypothetical protein GQ600_19902                    | 315   | 1,87   | 2,04   | 3,18   | 1,87   | 2,99   | 0,58  | 0,58  | 0,69  | 0,46  | 0,69  | -1,60 | 0.92323     | 1.710e-08 |
| KAF1781982.1 | Concanavalin A-like lectin/glucanase domain         | 2343  | 23,66  | 20,88  | 21,4   | 27,24  | 31,69  | 9,46  | 16,03 | 3,92  | 4,79  | 5,62  | -1,60 | 0.00101148  | 2.475e-17 |
| KAF1794122.1 | Intra-flagellar transport protein 57                | 1354  | 4,75   | 4,36   | 4,77   | 1,83   | 2,12   | 0,87  | 0,88  | 0,89  | 0,97  | 0,77  | -1,60 | 0.0911234   | 6.654e-10 |
| KAF1781231.1 | hypothetical protein GQ600_5796                     | 12398 | 5,61   | 4,08   | 4,72   | 2,85   | 2,33   | 0,83  | 0,42  | 1,39  | 1,35  | 1,47  | -1,58 | 0.00930223  | 2.385e-11 |
| KAF1778945.1 | Ankyrin repeat-containing domain                    | 1143  | 7,63   | 7,64   | 6,53   | 8,96   | 6,45   | 1,45  | 3,92  | 1,83  | 1,35  | 2,24  | -1,58 | 0.337256    | 3.563e-12 |
| KAF1787239.1 | P-loop containing nucleoside triphosphate hydrolase | 449   | 1,31   | 2,32   | 1,77   | 1,18   | 0,08   | 0,04  | 0     | 0     | 0,04  | 0,41  | -1,56 | 0.123409    | 1.293e-04 |
| KAF1794774.1 | Sec8 exocyst complex component specific domain      | 3016  | 21,9   | 22,36  | 24,98  | 20,19  | 22,91  | 8,12  | 7,39  | 6,44  | 6,1   | 6,55  | -1,56 | 0.515297    | 2.650e-29 |
| KAF1772290.1 | Cyclic nucleotide-binding-like                      | 2942  | 2,17   | 2,32   | 1,72   | 2,4    | 3,24   | 0,69  | 0,13  | 0,79  | 0,63  | 0,45  | -1,56 | 0.787437    | 2.966e-06 |
| KAF1793047.1 | hypothetical protein GQ600_3185                     | 5764  | 150,98 | 139,45 | 130,88 | 115,31 | 153,98 | 25,82 | 26,68 | 55,97 | 55,71 | 53,41 | -1,56 | 0.0460971   | 5.665e-18 |
| KAF1781408.1 | P-loop containing nucleoside triphosphate hydrolase | 4018  | 40,11  | 36,39  | 34,73  | 73     | 139,8  | 35,24 | 29,26 | 10,31 | 12,28 | 10,42 | -1,55 | 6.99263e-06 | 2.798e-18 |
| KAF1781229.1 | hypothetical protein GQ600_5794                     | 954   | 1,01   | 1,08   | 1,19   | 0,98   | 0,96   | 0,22  | 0     | 0,3   | 0,38  | 0,12  | -1,54 | 0.537026    | 4.005e-05 |
| KAF1786000.1 | EF-Hand 1, calcium-binding site                     | 939   | 3,92   | 5,08   | 5,12   | 0,49   | 1      | 0,25  | 0     | 1,29  | 1,35  | 1,38  | -1,54 | 0.000129071 | 7.231e-08 |
| KAF1772261.1 | Major facilitator superfamily domain                | 1248  | 0,64   | 0,52   | 0,22   | 1,18   | 0,83   | 0,18  | 0,21  | 0,05  | 0,08  | 0     | -1,53 | 0.0405746   | 1.335e-04 |
| KAF1773437.1 | P-loop containing nucleoside triphosphate hydrolase | 613   | 5,94   | 6,56   | 5,6    | 3,46   | 2,04   | 1,05  | 0,63  | 1,34  | 2,27  | 0,94  | -1,53 | 0.0267777   | 2.020e-08 |

|              |                                                        |      |       |      |       |      |      |      |      |      |      |      |       |           |           |
|--------------|--------------------------------------------------------|------|-------|------|-------|------|------|------|------|------|------|------|-------|-----------|-----------|
| KAF1773201.1 | GAF domain-like                                        | 3286 | 14,28 | 12,8 | 12,93 | 9,81 | 8,9  | 2,07 | 4,17 | 4,36 | 4,46 | 3,38 | -1,53 | 0.125763  | 2.908e-22 |
| KAF1790437.1 | IQ motif, EF-hand binding site                         | 2104 | 0,93  | 0,72 | 0,35  | 1,38 | 1,7  | 0,47 | 0,08 | 0,1  | 0,08 | 0,12 | -1,52 | 0.0311586 | 9.994e-05 |
| KAF1784324.1 | Galactose-binding domain-like                          | 6319 | 0,71  | 1,12 | 1,5   | 0,9  | 0,42 | 0,04 | 0,29 | 0,05 | 0,21 | 0,2  | -1,51 | 0.517091  | 1.300e-04 |
| KAF1774614.1 | hypothetical protein GQ600_16164                       | 351  | 1,35  | 1,72 | 1,41  | 0,81 | 0,33 | 0,29 | 0    | 0,25 | 0,04 | 0,16 | -1,51 | 0.305888  | 1.918e-04 |
| KAF1793084.1 | hypothetical protein GQ600_12977                       | 1566 | 0,3   | 0,48 | 0,35  | 0,86 | 0,33 | 0,04 | 0    | 0,1  | 0    | 0,04 | -1,51 | 0.802848  | 2.581e-04 |
| KAF1781052.1 | ADP-ribosylation factor-like 2-binding protein, domain | 625  | 0,93  | 0,92 | 0,93  | 0,37 | 0,62 | 0,07 | 0,21 | 0,05 | 0,21 | 0,12 | -1,51 | 0,0043    | 9.823e-05 |
| KAF1779880.1 | hypothetical protein GQ600_7175                        | 1449 | 7,36  | 7,04 | 7,94  | 4,28 | 4,49 | 0,94 | 2,71 | 0,89 | 2,44 | 1,63 | -1,50 | 0,002352  | 2.896e-08 |
| KAF1778883.1 | P-loop containing nucleoside triphosphate hydrolase    | 3042 | 1,76  | 1,4  | 1,24  | 5,74 | 7,07 | 1,81 | 0,54 | 0,25 | 0,42 | 0,65 | -1,50 | 0,004523  | 5.704e-06 |

Supplementary Table S1. The 120 differentially expressed genes in the virus free PhF66– and PhF66 containing two bunyaviruses with cutoff values > 1,5 revealed by RNA-seq.

\*=proteins also found differentially expressed in the shotgun proteomic analysis. \*\*=proteins detected in shotgun proteomic analysis, but not differentially abundant.
