# Supplementary figures and images for: Bunyaviruses Affect Growth, Sporulation, and Elicitin Production in Phytophthora cactorum
Source: MDPI journal article supplement (doi:10.3390/v14122596), 2022-11-22

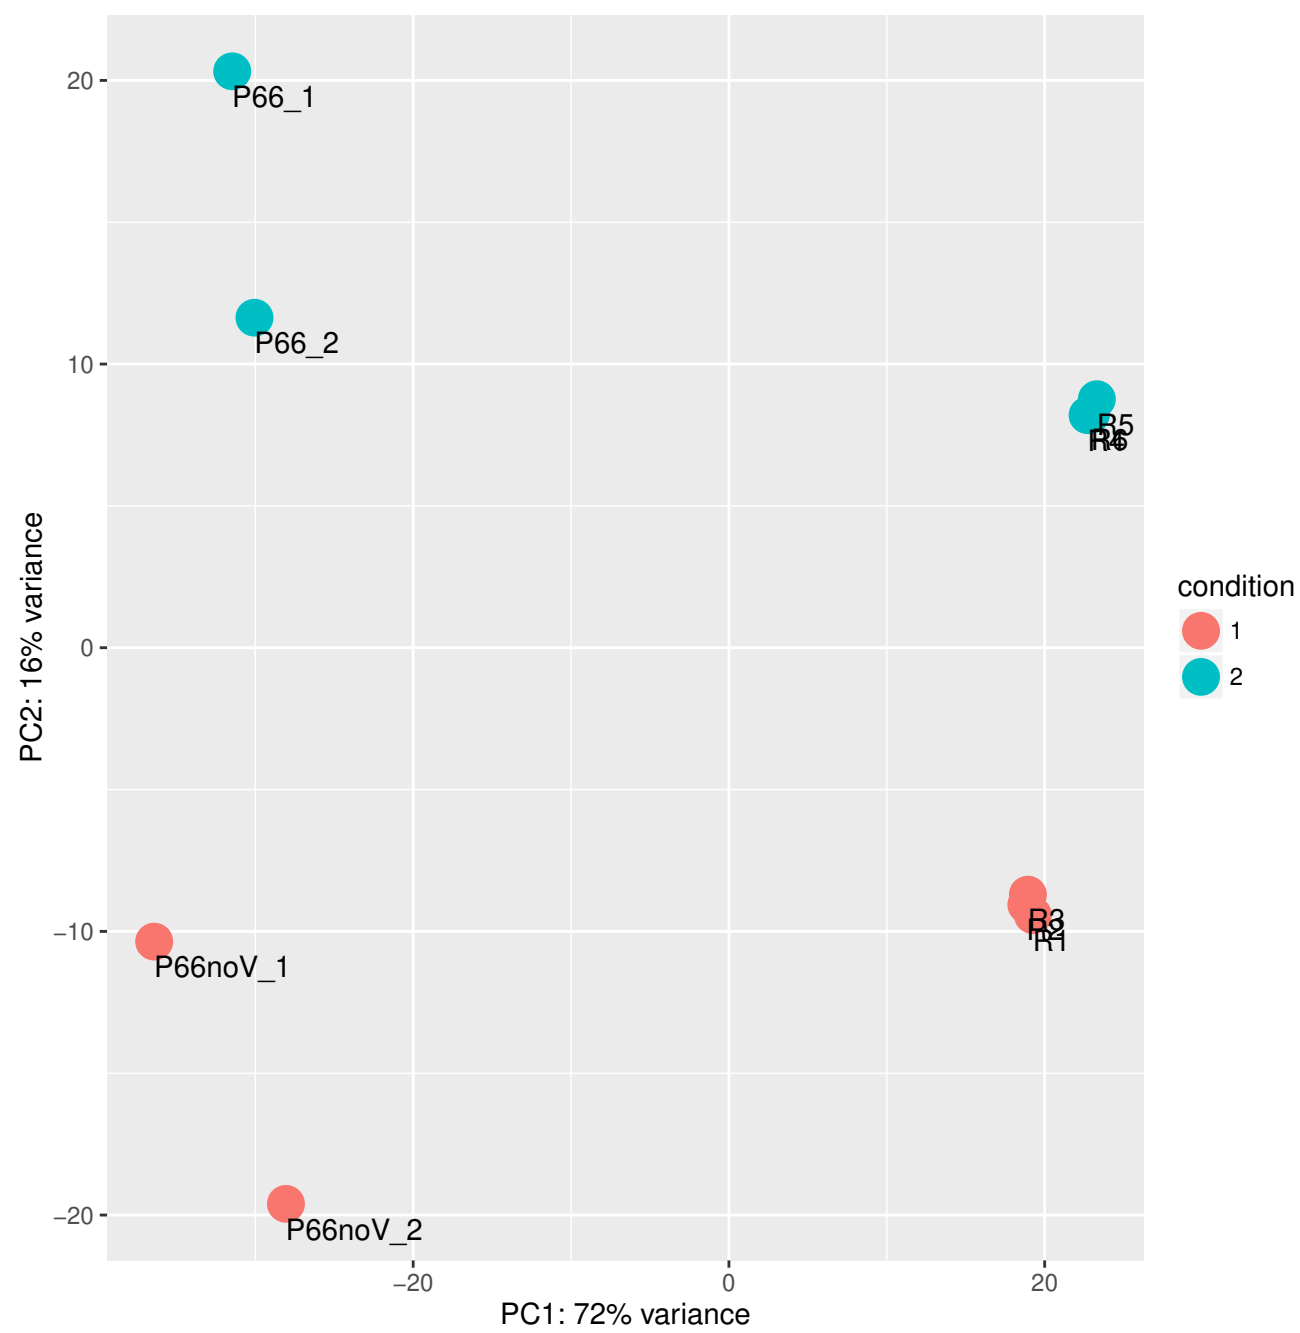

Color Key  
and Histogram

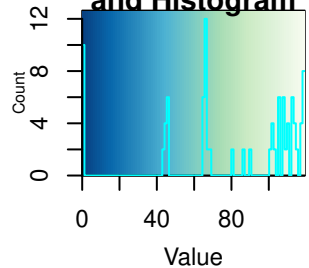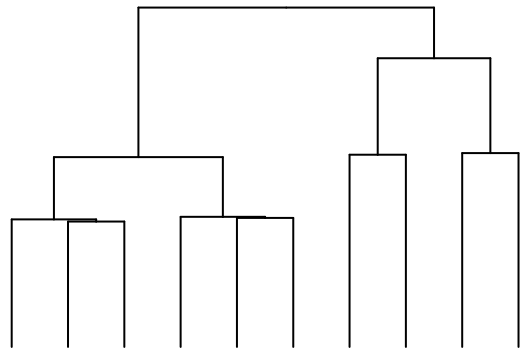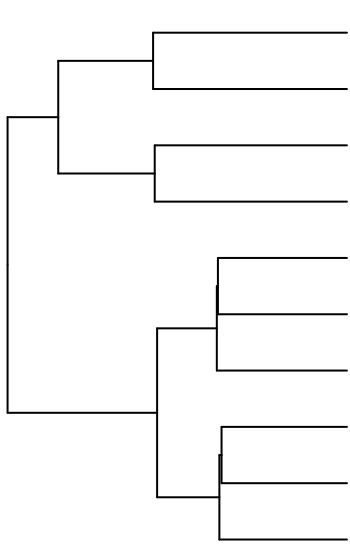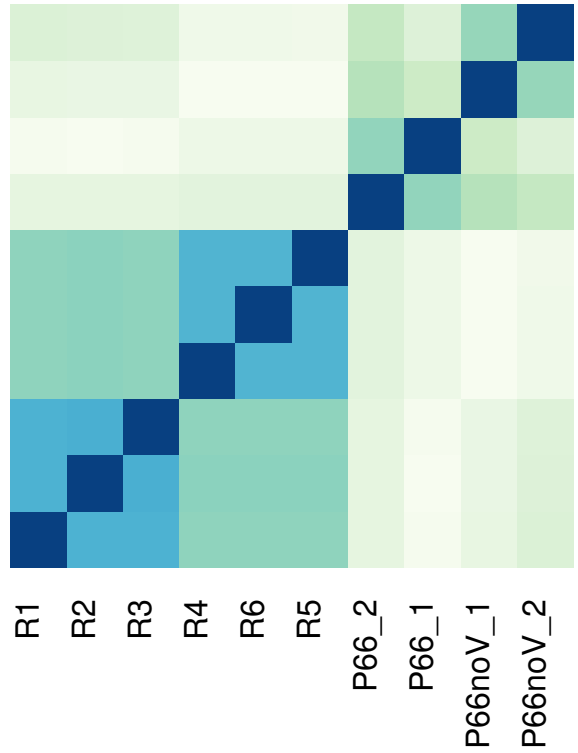

P66noV\_2  
P66noV\_1  
P66\_1  
P66\_2  
R5  
R6  
R4  
R3  
R2  
R1

Supplement: s1 [file s1]
